# Supplementary material
Source: publisher site journal article supplement (https://www.spandidos-publications.com/6329/downloadSupplementary)
Supplement: Supplementary file 1 [file downloadSupplementary]

## Sheet: Supplementary Table S2
Table SII. Raw data of HLA genotypes and allele frequency significantly associated with psoriasis.
HLA diplotypes	P-value	95 Down	95 Up	OR	Control	Case	SE	BATA
C*01:02-*06:02	3.59133e-19	3.09111	5.28626	4.07129	481	65	0.132404	1.40396
A*11:01-*33:03	1.13487e-15	0.289226	0.507434	0.386964	4091	53	0.13849	-0.949423
A*02:07-*11:01	7.88302e-11	1.4531	1.96071	1.6922	3389	190	0.0750066	0.526029
A*02:07-*30:01	6.91952e-10	2.93934	6.90518	4.5873	177	27	0.20677	1.52329
B*13:02-*46:01	8.91886e-10	2.64583	5.8125	3.98462	234	31	0.191308	1.38244
C*06:02-*12:02	7.48441e-09	3.3652	9.59778	5.82744	98	19	0.250804	1.76258
DQB1*02:01-*03:01	2.41493e-07	0.326308	0.642861	0.464813	2384	37	0.165872	-0.766119
B*46:01-*46:01	9.27428e-07	1.50585	2.48225	1.9472	1082	70	0.123601	0.666393
B*46:01-*57:01	1.59611e-06	4.14336	21.9443	10.0171	27	9	0.384987	2.30429
A*24:02-*33:03	1.67155e-06	0.369196	0.691621	0.511693	2517	43	0.154014	-0.67003
B*38:02-*46:01	1.85699e-06	1.601	2.94551	2.19449	658	48	0.149734	0.785948
C*03:02-*03:04	2.04664e-06	0.27713	0.636553	0.429577	1744	25	0.201595	-0.844955
DQA1*05:01-*06:01	3.08483e-06	0.126406	0.528855	0.277364	973	9	0.334971	-1.28242
C*03:02-*08:01	5.97622e-06	0.0994448	0.513668	0.248144	846	7	0.379613	-1.39375
DQB1*03:01-*06:09	7.8885e-06	0.0309949	0.442769	0.150771	597	3	0.578857	-1.89199
A*02:07-*02:07	9.30712e-06	1.51901	2.82986	2.09638	660	46	0.152714	0.740211
DPB1*05:01-*17:01	1.04654e-05	1.58175	3.1208	2.25129	521	39	0.166215	0.811504
B*15:02-*40:01	1.27519e-05	0.174477	0.594535	0.338827	1062	12	0.290417	-1.08226
DRB1*03:01-*12:02	1.2883e-05	0.173987	0.59285	0.337871	1065	12	0.290412	-1.08509
A*02:07-*11:02	1.70737e-05	1.52281	2.90161	2.12706	608	43	0.158012	0.75474
A*02:07-*24:02	1.81107e-05	1.29972	1.97527	1.61035	1832	98	0.104006	0.476454
DQB1*03:01-*03:01	2.27798e-05	0.477783	0.782081	0.615922	3355	69	0.121894	-0.484635
B*40:01-*58:01	2.72933e-05	0.458208	0.774437	0.600831	3041	61	0.129574	-0.509441
C*06:02-*07:02	2.7482e-05	1.52381	3.06167	2.19021	508	37	0.170478	0.783997
B*15:02-*58:01	4.35661e-05	0.034424	0.49259	0.167641	537	3	0.579019	-1.78593
B*13:02-*27:04	5.3427e-05	2.58219	12.4512	6.00934	45	9	0.36524	1.79332
A*01:01-*02:07	5.56206e-05	2.39947	10.4184	5.27141	57	10	0.342944	1.6623
DPB1*04:01-*05:01	6.02846e-05	0.524991	0.815627	0.658299	3912	86	0.10932	-0.418095
C*01:02-*01:02	7.91397e-05	1.22789	1.81743	1.50043	2227	111	0.0975985	0.405754
DRB1*08:03-*08:03	0.00021993	1.40881	2.95023	2.07127	479	33	0.18016	0.728163
C*04:01-*06:02	0.000274848	1.87026	7.31656	3.88868	85	11	0.320532	1.35807
DPA1*02:02-*02:02	0.000284004	1.05906	1.21131	1.13315	25603	959	0.0339583	0.125006
B*37:01-*46:01	0.000468497	2.00582	10.446	4.90527	49	8	0.381412	1.59031
B*13:02-*54:01	0.000484062	2.13793	12.9167	5.6833	37	7	0.412251	1.73753
A*11:01-*30:01	0.000536811	1.33438	2.7908	1.96064	506	33	0.179851	0.673273
DQB1*03:03-*05:02	0.000596115	1.17134	1.77446	1.44893	2056	99	0.103222	0.370826
B*13:01-*58:01	0.000600096	0.195551	0.707584	0.393309	839	11	0.303592	-0.93316
DQA1*05:05-*06:01	0.000620063	0.309219	0.770191	0.501442	1256	21	0.220187	-0.690268
A*33:03-*33:03	0.000757104	0.213924	0.7301	0.41569	866	12	0.290784	-0.877816
DQA1*01:02-*05:01	0.000764719	0.389005	0.809312	0.5708	1681	32	0.178639	-0.560717
DQA1*01:03-*01:03	0.000771312	1.30393	2.69413	1.90347	537	34	0.177034	0.643676
B*40:01-*40:01	0.000816753	0.50552	0.85114	0.661495	2809	62	0.128656	-0.413253
C*03:02-*15:02	0.000929117	0.114214	0.684642	0.312563	576	6	0.410451	-1.16295
DRB1*07:01-*09:01	0.00141693	1.30385	2.96048	2.00386	405	27	0.19893	0.695078
B*27:04-*38:02	0.00183055	1.40979	4.78899	2.71249	144	13	0.289715	0.997869
DRB1*12:02-*13:02	0.00207178	0.00264225	0.587446	0.104593	287	1	1.00177	-2.25767
DRB1*03:01-*11:01	0.00211896	0.226985	0.775179	0.441208	816	12	0.290905	-0.818238
A*02:01-*02:07	0.0023102	1.20736	2.46317	1.75063	601	35	0.174076	0.559975
DPA1*01:03-*02:02	0.00240762	0.818865	0.959099	0.886822	22765	676	0.0399154	-0.120111
B*13:02-*40:01	0.00278177	1.25006	2.93413	1.95674	384	25	0.20657	0.67128
B*15:18-*48:01	0.00304827	3.12694	3444.14	59.9794	1	2	1.22477	4.094
C*01:02-*12:02	0.00326251	1.15767	2.11702	1.5824	912	48	0.148314	0.458944
A*01:01-*30:01	0.00338607	2.14777	56.4104	12.8728	7	3	0.690114	2.55512
A*01:01-*11:02	0.00345163	1.82673	23.2976	7.50797	16	4	0.559077	2.01596
B*40:01-*46:01	0.00346622	1.08521	1.52661	1.29146	3379	145	0.085206	0.255772
C*03:02-*03:02	0.00353959	0.233257	0.796778	0.453455	794	12	0.290964	-0.790859
DQA1*02:01-*03:02	0.00385752	1.22301	2.92332	1.9338	373	24	0.210748	0.659485
C*03:02-*04:01	0.00393421	0.102538	0.745731	0.317239	473	5	0.449646	-1.1481
DQA1*02:01-*03:03	0.00396817	1.40692	7.03999	3.38505	71	8	0.37303	1.21937
DQB1*03:01-*03:02	0.00397385	0.492737	0.887344	0.668442	2198	49	0.144673	-0.402806
C*01:02-*07:02	0.00426396	1.07017	1.44338	1.24605	4542	188	0.0748804	0.219978
DQA1*01:02-*02:01	0.00427678	1.20387	2.87635	1.90318	379	24	0.210647	0.643524
C*07:02-*08:01	0.00442476	0.392268	0.860722	0.592687	1417	28	0.191016	-0.523089
B*58:01-*58:01	0.00447309	0.238356	0.814364	0.463393	777	12	0.291011	-0.76918
DQA1*05:01-*05:05	0.00458276	0.338562	0.843894	0.549224	1147	21	0.220359	-0.599249
DQB1*02:02-*04:01	0.00487711	1.26395	4.51111	2.50365	144	12	0.300574	0.917751
DRB1*04:05-*07:01	0.00489548	1.24883	4.2152	2.39631	163	13	0.288314	0.873931
DQB1*02:02-*05:02	0.00520262	1.24383	3.82818	2.26503	199	15	0.267878	0.817588
B*13:02-*38:02	0.00536124	1.33448	6.64627	3.20446	75	8	0.372022	1.16454
DQA1*03:01-*03:01	0.00560904	1.27396	5.2168	2.73113	110	10	0.330391	1.00471
DQA1*01:01-*03:02	0.00578221	1.21793	3.18329	2.02366	297	20	0.231158	0.704907
DQB1*02:02-*03:03	0.00637887	1.16288	2.83193	1.85815	372	23	0.21502	0.61958
DQB1*02:02-*05:01	0.00640149	1.36737	9.2006	3.91845	46	6	0.434134	1.3657
DQA1*01:03-*05:05	0.00707064	0.382036	0.879625	0.59285	1265	25	0.202133	-0.522814
DQB1*02:02-*06:01	0.00709613	1.16911	3.22792	2.00328	270	18	0.24357	0.694785
DRB1*08:03-*09:01	0.00721599	1.09001	1.73641	1.38453	1716	79	0.115361	0.325357
B*27:04-*37:01	0.00750663	1.59337	35.0341	9.01112	10	3	0.658331	2.19846
DQA1*01:03-*03:02	0.00794749	1.0804	1.71571	1.37009	1756	80	0.114616	0.314873
DRB1*03:01-*15:01	0.00800177	0.276051	0.856396	0.507333	828	14	0.269636	-0.678587
DQB1*06:01-*06:01	0.00826752	1.10552	2.03365	1.51601	932	47	0.149722	0.416084
C*03:04-*06:02	0.00857873	1.16796	3.13179	1.96879	290	19	0.236953	0.677417
DQB1*03:01-*06:01	0.00883474	0.605493	0.936464	0.757383	3483	88	0.10825	-0.277886
DRB1*09:01-*15:02	0.00925844	1.15727	2.94592	1.89514	333	21	0.225142	0.639294
A*24:02-*30:01	0.00987159	1.137	3.04639	1.91592	298	19	0.236758	0.650198
DPB1*05:01-*21:01	0.0101519	0.279414	0.866918	0.513547	818	14	0.269663	-0.666415
A*11:01-*11:01	0.0101597	0.668575	0.949787	0.799805	5058	135	0.0875937	-0.223387
DQB1*03:03-*06:01	0.0102321	1.0592	1.58968	1.3039	2376	103	0.10098	0.265362
B*27:04-*46:01	0.0102979	1.1281	2.64078	1.76365	426	25	0.205948	0.567388
DQA1*01:05-*02:01	0.0104567	1.31302	15.2894	5.22372	23	4	0.541798	1.65321
DRB1*04:05-*10:01	0.0111195	1.16898	5.75846	2.79455	86	8	0.369723	1.02767
DRB1*09:01-*16:02	0.0113834	1.0881	2.00123	1.49195	947	47	0.149665	0.400086
B*40:02-*58:01	0.0116039	0.00352219	0.786395	0.139646	215	1	1.00236	-1.96865
DQB1*03:02-*03:02	0.011621	1.10797	2.81686	1.8133	348	21	0.224855	0.595151
A*02:01-*33:03	0.0117154	0.255377	0.873232	0.496683	725	12	0.291169	-0.699803
DPB1*05:01-*09:01	0.0124983	0.242211	0.878291	0.487595	677	11	0.304061	-0.718271
DQB1*02:01-*03:02	0.0127351	0.283945	0.881025	0.521855	805	14	0.269699	-0.650366
DRB1*11:01-*12:02	0.0131243	0.313198	0.899485	0.550572	872	16	0.252416	-0.596797
C*07:02-*12:02	0.0133015	1.07022	1.99544	1.47833	915	45	0.152913	0.390915
B*44:03-*54:01	0.0142853	1.35835	104.935	15.0177	4	2	0.866064	2.70923
DQB1*04:01-*05:02	0.0153931	1.06735	2.05289	1.49923	822	41	0.160231	0.404949
DQA1*01:02-*03:02	0.0168946	1.03712	1.48716	1.24661	3137	130	0.089881	0.22043
A*30:01-*31:01	0.0169398	1.13139	12.7726	4.45	27	4	0.535821	1.4929
DQB1*02:02-*03:02	0.0178507	1.11802	3.577	2.08232	202	14	0.276489	0.733481
DRB1*08:03-*11:01	0.0179314	0.306101	0.912126	0.549591	819	15	0.260681	-0.598581
DQA1*01:03-*02:01	0.0180717	1.11261	3.55887	2.07211	203	14	0.276445	0.72857
DRB1*07:01-*16:02	0.019479	1.05054	5.13583	2.50326	96	8	0.368081	0.917596
DRB1*07:01-*08:03	0.0201204	1.07614	3.43756	2.00302	210	14	0.276148	0.694655
DQA1*01:01-*05:05	0.0203934	1.05005	3.71352	2.07198	174	12	0.298576	0.728503
DQA1*01:04-*02:01	0.0203943	1.08352	4.08566	2.218	149	11	0.31255	0.796607
DPB1*03:01-*03:01	0.0205086	1.03999	5.07932	2.4775	97	8	0.367935	0.90725
DRB1*07:01-*10:01	0.0209452	1.05816	11.8003	4.14311	29	4	0.533432	1.42145
DQB1*05:01-*06:01	0.0217891	1.04006	2.63967	1.70085	371	21	0.224458	0.531128
DPB1*02:02-*05:01	0.0219433	1.03207	1.6065	1.2951	2020	87	0.109803	0.258591
DRB1*12:01-*12:02	0.0223274	0.122057	0.889836	0.378032	397	5	0.450095	-0.972777
A*02:03-*30:01	0.0223546	1.02731	6.69526	2.90699	62	6	0.427624	1.06712
DRB1*10:01-*12:01	0.0231472	1.02499	11.3671	4.00506	30	4	0.532354	1.38756
A*11:01-*31:01	0.0232376	0.271441	0.928715	0.528048	682	12	0.291319	-0.638568
DQB1*02:02-*05:03	0.0238282	1.00963	4.92144	2.40323	100	8	0.367515	0.876813
DQB1*03:02-*06:09	0.0246874	0.00378487	0.846076	0.150125	200	1	1.00253	-1.89629
C*03:03-*06:02	0.0250543	0.999525	5.52595	2.56442	82	7	0.393852	0.941734
DQA1*03:01-*05:01	0.0266469	0.289012	0.939365	0.545646	715	13	0.27998	-0.605785
DRB1*04:05-*14:05	0.0271414	1.01047	3.79735	2.06543	160	11	0.311811	0.725338
DRB1*03:01-*13:02	0.0274973	0.0303763	0.921505	0.252263	238	2	0.710119	-1.37728
A*01:01-*11:01	0.0279204	1.00431	3.77303	2.0525	161	11	0.311749	0.719061
DRB1*08:03-*10:01	0.0288162	0.971777	4.72564	2.31076	104	8	0.366991	0.837576
C*03:04-*15:02	0.0295341	0.226625	0.953408	0.498387	542	9	0.336189	-0.696379
A*02:03-*02:07	0.029546	1.03136	2.50387	1.64554	420	23	0.214304	0.498068
B*46:01-*56:01	0.0305705	0.936915	10.2387	3.6407	33	4	0.5295	1.29217
DRB1*07:01-*12:02	0.0308413	1.03646	2.94278	1.80487	283	17	0.249848	0.590489
A*01:01-*02:01	0.0333214	0.910831	9.91096	3.53376	34	4	0.528657	1.26236
B*40:06-*58:01	0.033724	0.00417976	0.936072	0.165893	181	1	1.00279	-1.79641
C*03:02-*14:02	0.0342458	0.183803	0.955217	0.459759	457	7	0.380936	-0.777052
DQA1*01:03-*01:05	0.0344803	0.936635	4.54411	2.22524	108	8	0.366505	0.799865
DQA1*01:04-*01:04	0.0351573	0.994816	2.82106	1.73144	295	17	0.24956	0.548952
DQB1*03:03-*05:01	0.0352097	1.02024	2.42721	1.60977	448	24	0.20968	0.47609
DPB1*01:01-*05:01	0.0366213	0.857237	15.1925	4.50496	20	3	0.619193	1.50518
DPB1*02:02-*02:02	0.0388633	1.00563	4.42304	2.25319	120	9	0.345704	0.812346
DRB1*12:02-*16:02	0.0389843	1.00649	2.27126	1.54247	526	27	0.197497	0.433384
A*11:01-*24:02	0.0391703	0.722044	0.991819	0.848773	5827	165	0.0793718	-0.163963
C*06:02-*15:02	0.0393928	0.903344	4.95785	2.31067	91	7	0.392318	0.837539
A*02:07-*26:01	0.0394968	0.963295	2.93618	1.74675	258	15	0.265725	0.557755
DPB1*14:01-*17:01	0.0408766	0.819429	14.3761	4.29085	21	3	0.617268	1.45649
B*38:02-*58:01	0.0417455	0.986043	2.22407	1.51084	537	27	0.197399	0.412663
DQB1*02:02-*03:01	0.042745	0.98062	2.21159	1.50243	540	27	0.197373	0.407085
DRB1*14:05-*16:02	0.0431799	0.884419	4.84745	2.26112	93	7	0.392016	0.81586
DPA1*01:03-*01:03	0.0433009	0.706502	0.996233	0.841906	5021	141	0.0857842	-0.172087
DQB1*03:03-*03:03	0.044141	0.998105	1.64276	1.28997	1608	69	0.123215	0.254616
B*37:01-*40:01	0.0451584	0.8753	4.79387	2.23702	94	7	0.39187	0.805143
DRB1*04:01-*09:01	0.0453693	0.78478	13.6378	4.09584	22	3	0.615512	1.40997
B*13:01-*38:02	0.0454251	0.967631	2.83858	1.71683	280	16	0.257174	0.54048
DQA1*02:01-*05:05	0.0455472	0.959316	3.05127	1.78224	236	14	0.275196	0.577874
DQA1*03:02-*03:03	0.046387	0.996804	1.71924	1.32078	1320	58	0.13441	0.27822
B*13:02-*15:18	0.047076	0.701683	32.2695	6.67435	9	2	0.781779	1.89827
B*51:01-*58:01	0.0471761	0.165026	0.993948	0.452527	398	6	0.411395	-0.792909
B*27:04-*54:01	0.0492874	0.857506	4.69018	2.19036	96	7	0.391588	0.784066
HLA haplotypes	p.value	95 Down	95 Up	OR	Control	Case	SE	BATA
A*02:07	3.69367e-34	1.60218	1.89394	1.74331	10510	605	0.0422158	0.555787
C*06:02	2.95624e-29	2.20527	2.96436	2.56301	2341	199	0.0740674	0.941184
B*46:01	7.18983e-22	1.3957	1.64017	1.51406	12905	646	0.0407389	0.414793
A*33:03	5.02194e-21	0.502729	0.650381	0.572954	12818	246	0.0646282	-0.556951
C*03:02	5.10741e-17	0.544829	0.697017	0.61737	13015	269	0.0618715	-0.482286
B*13:02	5.41838e-15	1.9228	2.84379	2.3483	1461	114	0.0974166	0.853693
B*58:01	9.21486e-13	0.567185	0.735202	0.647058	11230	243	0.0651	-0.435319
C*01:02	8.44341e-12	1.19122	1.36502	1.2758	21439	905	0.0344397	0.243577
DQA1*02:01	1.12991e-11	1.60567	2.28186	1.92079	2178	139	0.0876755	0.652735
DQB1*02:02	2.52904e-11	1.57268	2.22308	1.87618	2294	143	0.0863861	0.629239
A*30:01	3.20579e-11	1.70486	2.55511	2.0967	1521	106	0.100623	0.740364
DQB1*03:01	3.3193e-11	0.728717	0.845822	0.785569	28181	742	0.0376496	-0.241346
DRB1*07:01	5.21332e-11	1.57506	2.24666	1.88786	2168	136	0.0885879	0.635443
DQB1*02:01	2.14881e-10	0.586031	0.764365	0.670696	10350	232	0.0666385	-0.399439
DQA1*05:01	2.69318e-09	0.59283	0.778385	0.680812	9716	221	0.0682754	-0.384468
DRB1*03:01	2.20967e-08	0.598572	0.791061	0.68973	9159	211	0.0698729	-0.371455
A*01:01	4.02609e-08	1.90618	3.59501	2.64706	511	45	0.155604	0.973449
DPB1*17:01	1.28343e-07	1.58161	2.60797	2.0454	1029	70	0.123657	0.715593
B*38:02	1.62904e-07	1.29571	1.73725	1.50399	3922	196	0.0734214	0.408121
DQB1*06:09	4.10258e-07	0.348492	0.662681	0.486962	2525	41	0.157543	-0.719569
C*08:01	7.1087e-07	0.576722	0.799758	0.681349	6772	154	0.0816995	-0.38368
DQA1*05:05	1.51743e-06	0.686129	0.85894	0.768824	12655	325	0.0564781	-0.262893
DRB1*11:01	5.18582e-06	0.607863	0.829701	0.712254	7152	170	0.0778192	-0.339321
DQB1*05:01	2.4241e-05	1.23419	1.7564	1.47762	2768	136	0.0880218	0.390434
DRB1*13:02	2.57413e-05	0.399076	0.742011	0.550858	2396	44	0.152244	-0.596279
DPA1*01:03	4.00335e-05	0.826524	0.936348	0.880099	36340	1070	0.0315717	-0.127721
B*15:02	6.08739e-05	0.529329	0.817608	0.661719	3988	88	0.107926	-0.412915
B*57:01	6.76818e-05	1.85785	5.60951	3.33803	144	16	0.263587	1.20538
DPB1*04:01	7.60359e-05	0.653006	0.87242	0.756693	7763	196	0.0725572	-0.278798
B*40:02	7.85337e-05	0.273838	0.697814	0.449894	1334	20	0.225351	-0.798743
DQA1*03:02	0.000110649	1.07837	1.25645	1.16476	18444	713	0.0386135	0.152511
DQB1*03:03	0.000114446	1.07552	1.24721	1.15886	19762	760	0.037426	0.147434
B*37:01	0.000159607	1.5148	3.5753	2.37702	316	25	0.207841	0.865848
B*27:04	0.000172352	1.18783	1.71886	1.43455	2599	124	0.0921026	0.360853
C*12:02	0.000178063	1.14615	1.53896	1.33145	4360	193	0.0737861	0.286271
DPB1*21:01	0.00021241	0.339794	0.755838	0.517363	1566	27	0.194188	-0.65901
B*40:01	0.000225064	0.790454	0.932746	0.859324	20937	601	0.0417827	-0.151609
DRB1*08:03	0.000514037	1.08449	1.33711	1.2057	9460	379	0.0527078	0.187056
DPB1*02:02	0.000567213	1.10497	1.43675	1.26249	5766	242	0.0658741	0.233086
C*03:04	0.000570434	0.751461	0.927688	0.836021	13260	370	0.0530283	-0.179101
DQA1*06:01	0.000596078	0.730454	0.920887	0.821457	11163	306	0.0582354	-0.196676
DRB1*09:01	0.0008722	1.05837	1.24441	1.14845	16623	634	0.0408854	0.138416
B*50:01	0.000926393	1.79698	9.22895	4.36957	55	8	0.378438	1.47467
DRB1*16:02	0.00119482	1.10258	1.4767	1.27916	4608	196	0.0731624	0.246203
DRB1*10:01	0.00170351	1.17975	2.0588	1.57277	1070	56	0.137205	0.452836
A*11:01	0.00252222	0.843519	0.96548	0.902904	30172	910	0.0341546	-0.102139
DQA1*01:05	0.00270331	1.15872	2.01122	1.54036	1112	57	0.135929	0.432017
DQA1*01:03	0.00273542	1.05318	1.28178	1.16315	11124	430	0.0494916	0.151132
DPB1*09:01	0.00291836	0.373647	0.845269	0.574197	1359	26	0.198068	-0.554783
DQB1*05:02	0.00318149	1.04843	1.26463	1.15262	12323	472	0.0472629	0.142034
DRB1*12:02	0.0032133	0.747765	0.945708	0.842286	10606	298	0.0590236	-0.171636
DPA1*02:02	0.00419788	1.0182	1.1014	1.05916	81860	2872	0.0199325	0.0574765
C*15:02	0.00572083	0.628117	0.929736	0.76777	4220	108	0.0976208	-0.264266
DQB1*06:01	0.00580286	1.0351	1.22824	1.12847	15121	567	0.0431729	0.120865
B*15:18	0.00916938	1.16054	2.95345	1.90024	332	21	0.225088	0.64198
A*24:02	0.0110261	0.818817	0.975494	0.894508	17992	537	0.0441797	-0.111482
C*14:02	0.0205466	0.64855	0.965649	0.795195	3962	105	0.0990444	-0.229168
A*31:01	0.0226876	0.526641	0.960605	0.719352	1961	47	0.147716	-0.329405
DRB1*15:02	0.0259467	1.0241	1.63433	1.30213	1800	78	0.1158	0.264004
DRB1*04:05	0.0269427	1.01455	1.29372	1.14762	7362	281	0.06106	0.137691
DQB1*04:01	0.0310375	1.00925	1.27198	1.13476	8214	310	0.0581494	0.126422
C*03:03	0.0457354	0.693783	0.997407	0.835198	4527	126	0.0905042	-0.180086
C*04:01	0.0478611	0.663798	0.996491	0.817417	3708	101	0.101016	-0.201606
DQA1*03:03	0.0488367	0.997857	1.288	1.13582	6749	255	0.0640585	0.127354
